# Supplementary material for: The effect of artificial selection on phenotypic plasticity in maize
Source: PubMed Central journal article supplement (PMC5677005; doi:10.1038/s41467-017-01450-2), 2017-11-07
Supplement: 41467_2017_1450_MOESM3_ESM.pdf [file 41467_2017_1450_MOESM3_ESM.pdf]

### **Description of Additional Supplementary Files**

File Name: Supplementary Dataset 1

Description: Genotyping-by-sequencing inbred sample identifiers and line names

File Name: Supplementary Software 1

Description: Scripts used for estimating high- and low-Fst SNP by environment interactions
